# Supplementary material
Source: publisher figshare collection journal article supplement (https://tandf.figshare.com/articles/dataset/_/5976637)
Supplement: Supplementary file 1 [file 1]

## **Mesoproterozoic rift sedimentation, fluid events and uranium prospectivity in the Cariewerloo Basin, Gawler Craton, South Australia**

S. R. Beyer<sup>a\*</sup>, K. Kyser<sup>a</sup>, P. Polito<sup>b</sup> and G. L. Fraser<sup>c</sup>

<sup>a</sup>Queen's University, Department of Geological Sciences and Geological Engineering, Kingston, Ontario K7L 3N6, Canada; <sup>b</sup> Independence Group NL, South Perth, WA 6151, Australia; <sup>c</sup>Geoscience Australia, Canberra, ACT 2601, Australia

\* corresponding author: [s.beyer@queensu.ca](mailto:s.beyer@queensu.ca)

### **SUPPLEMENTARY PAPERS**

*Australian Journal of Earth Sciences* (2018) 65 (4),  
<http://dx.doi.org/10.1080/08120099.2018.1439098>

---

Copies of Supplementary Papers may be obtained from the Geological Society of Australia's website ([www.gsa.org.au](http://www.gsa.org.au)), the Australian Journal of Earth Sciences website ([www.ajes.com.au](http://www.ajes.com.au)) or from the National Library of Australia's Pandora archive (<http://nla.gov.au/nla.arc-25194>).

---

### **SUPPLEMENTARY PAPERS**

Appendix 1. Lithogeochemistry data. (Excel file)

Appendix 2. <sup>40</sup>Ar/<sup>39</sup>Ar analytical data. (Excel file)
